# Supplementary material
Source: PubMed Central journal article supplement (PMC4059148)
Supplement: supp_M114.569723_jbc.M114.569723-1.pdf [file supp_M114.569723_jbc.M114.569723-1.pdf]

Circadian Regulation of *Tshb* Expression by Rev-erba (NR1D1) and NCOR1

**Irene O. Aninye<sup>‡1</sup>, Shunichi Matsumoto<sup>‡1</sup>, Aniket R. Sidhaye<sup>‡</sup>, and Fredric E. Wondisford<sup>‡2</sup>**

<sup>‡</sup>From the Division of Metabolism, Departments of Pediatrics, Physiology and Medicine, Johns Hopkins University School of Medicine, Baltimore, Maryland 21287

## **Supplemental Data**

**Table S1.** qPCR Primer Sequences for mRNA Analysis

| <b>Gene</b>  | <b>Forward Primer (5' -&gt; 3')</b> | <b>Reverse Primer (5' -&gt; 3')</b> |
|--------------|-------------------------------------|-------------------------------------|
| <i>36B4</i>  | TGTTTGACAACGGCAGCATT                | CCGAGGCAACAGTTGGGTA                 |
| <i>Cga</i>   | GCACTCCGTATGATTCTCCACTCTG           | GTGTATGGGCTGTTGCTTCTCC              |
| <i>Gh</i>    | CCTCAGCAGGATTTTCACCA                | CTTGAGGATCTGCCCAACAC                |
| <i>Ncor1</i> | AGAACTTCTGATGTTTCTTCCAG             | CTGGAGACTTGGCTGGTATA                |
| <i>Ncor2</i> | GCAAGAGCCAGCAGCA                    | TCTGTCTTCTCCTTGCTGAG                |
| <i>Nr1d1</i> | GCAAGGCAACACCAAGAATG                | GGCGTGAAGCTCATAGAGAAG               |
| <i>Tshb</i>  | GACTTCCTGATCTCAAAGACC               | CTGGTATTTCCACCGTTCTGTAG             |

**Table S2.** qPCR Primer Sequences for ChIP Analysis

| <b>Gene</b> | <b>TSS Locus</b> | <b>Forward Primer (5' -&gt; 3')</b> | <b>Reverse Primer (5' -&gt; 3')</b> |
|-------------|------------------|-------------------------------------|-------------------------------------|
| <i>Cga</i>  | -1324            | TGCTGCACAAACCTGAGAAC                | GCAAGTTGGTCTGCTCCTTC                |
| <i>Cga</i>  | -647             | AAATCCACTGCTTCCCATGT                | TCCATACAGCAGCCTAAGAA                |
| <i>Cga</i>  | -72              | CTTATGTGCAGCTGGGAACA                | ATGTGTTCTGGGCAGGTGAT                |
| <i>Cga</i>  | +535             | GACGTCACCATGCGTTCTAA                | TCAGCAATGGTTGGCAAATA                |
| <i>Gh</i>   | -576             | AGGCCAACAAAATGACCAAG                | CTCTCCAAGAAGGCGATGTC                |
| <i>Gh</i>   | -231             | TGCATAACCAATGCCATAA                 | TTGCGTGCCCTTTTATACC                 |
| <i>Gh</i>   | +146             | TGAGTGC GTTCCA ACTTCTG              | AGGAGAAACCTGGGAGCAAT                |
| <i>Gh</i>   | +389             | CTGGCTGCTGACACCTACAA                | TCCCCTACCCCATAGTTTCC                |
| <i>Tshb</i> | -4500            | TCTTCAAGGCAATACTCCTGGCCT            | AGACTGTAAGTCAAGCTGCCCCACT           |
| <i>Tshb</i> | -3755            | TGTAGCTTGTTTCCTTGTTGGGTGC           | AGAGGGATAGGGAGAGATGAAGCA            |
| <i>Tshb</i> | -2959            | TGAGCTCAGGACTAACTGCTCCAT            | AGAGCTGTGAAGCCCAGTCCAAAT            |
| <i>Tshb</i> | -2362            | ATGTAAGCTCCACTCTGGACAGCA            | AAGATCCACAAGTCAGACAGCCCT            |
| <i>Tshb</i> | -1861            | CCCAAACGGAAAGGAAAAAT                | AACCCCCACTTCTCCCTAGA                |
| <i>Tshb</i> | -684             | CTCCACTCCTCTGCTTCTG                 | TTCTGTCTTGGCCCTTCACT                |
| <i>Tshb</i> | +18              | ATGAACGGAGAGTGGGTCATCACA            | TCATCTTACAGGTTCTGCACAGGGT           |
| <i>Tshb</i> | +641             | GGGGTTGTTCAAAGGTGGAGAAAA            | ACACATTTCTCTCTGCTCTGCTAAT           |
| <i>Tshb</i> | +1014            | GGTCTGATGGTCACGGA ACT               | TTTTGCCACATAACCTTCC                 |
